# Supplementary material for: The Canonical Long-Chain Fatty Acid Sensing Machinery Processes Arachidonic Acid To Inhibit Virulence in Enterohemorrhagic Escherichia coli
Source: PubMed Central journal article supplement (PMC7845647; doi:10.1128/mbio.03247-20), 2021-01-19

# A Secretion profile

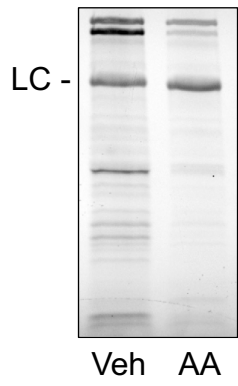

# B *stx2a*

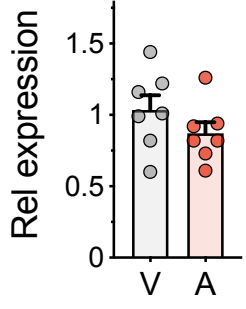

Supplement: mBio.03247-20-sf001.pdf [file mBio.03247-20-sf001.pdf]
