# Supplementary material for: The Canonical Long-Chain Fatty Acid Sensing Machinery Processes Arachidonic Acid To Inhibit Virulence in Enterohemorrhagic Escherichia coli
Source: PubMed Central journal article supplement (PMC7845647; doi:10.1128/mbio.03247-20), 2021-01-19

**A** Whole cell lysates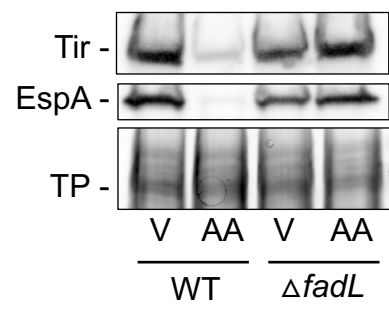**B** Whole cell lysates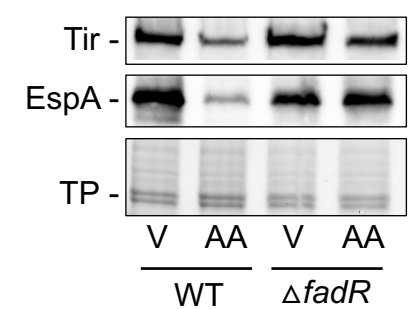**C** Secreted protein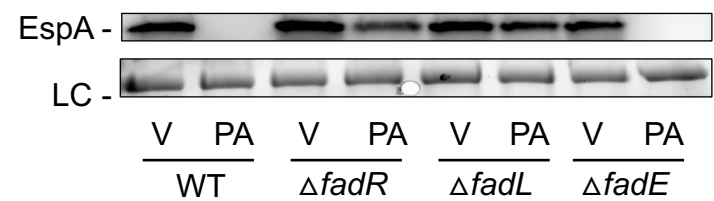**D** EHEC | Vehicle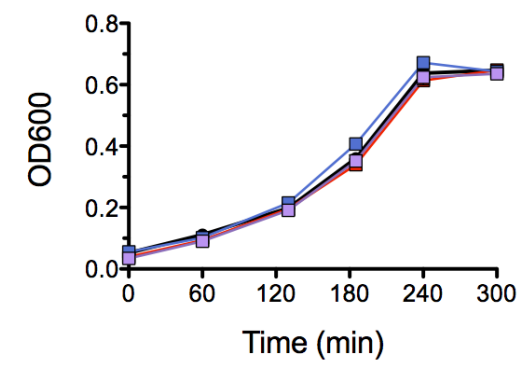**E** EHEC | 8  $\mu$ M AA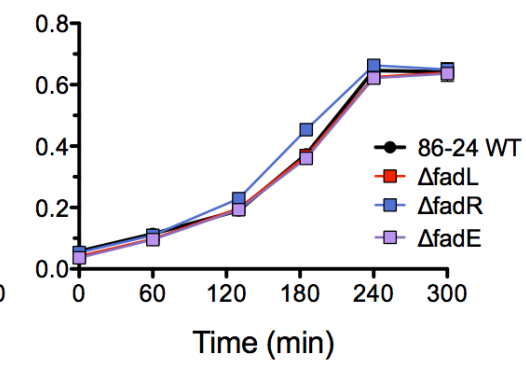

Supplement: mBio.03247-20-sf002.pdf [file mBio.03247-20-sf002.pdf]
